# Supplementary material for: Assessment of Artificial Intelligence Models for Developing Single‐Value and Loop Rating Curves
Source: Hindawi journal article supplement (doi:10.1155/2021/6627011), 2021-01-01
Supplement: f1 [file 6627011.f1.docx]

Appendix A:

This appendix presents the detailed calculation process of the ranking system applied to different methods for developing stage-discharge rating curves. The calculations of the ranking system for single stage-discharge curve (Data set 1 to Data set 4) and looped rating curve (Data set 5 to Data set 8) are shown in Tables 8-15, respectively. The ranking numbers calculated in the last columns of Tables 8-15 were transferred into Tables 6-7 to delineate the model with the best performance for the data and criteria considered. When a method performs the best based on a criterion, a rank value of one will be assigned to that method. The lower the rank value is, the better the method performance. According to Table 6, the summation of ranks for ANN is much lower than conventional method and therefore, ANN was selected as best fit model while the conventional method was declared as the second best method for Data set 1.

**Table 8** Ranking the performances of different models for developing stage-discharge rating curves of Data set 1

| Method | Data set 1 (test data) | | | | | | | | summation of ranks | Rank for Data set 1 |
| --- | --- | --- | --- | --- | --- | --- | --- | --- | --- | --- |
| SSE | Rank | NE | Rank | MARE | Rank | MXARE | Rank |
| Conventional | 4978.88 | 2 | 0.980 | 2 | 0.083 | 1 | 0.231 | 2 | 7 | 2 |
| EA | 5752.12 | 3 | 0.977 | 4 | 0.087 | 3 | 0.255 | 3 | 13 | 3 |
| MHBMO | 5752.13 | 4 | 0.977 | 4 | 0.090 | 5 | 0.255 | 3 | 16 | 5 |
| ANN | 4706.09 | 1 | 0.980 | 2 | 0.085 | 2 | 0.214 | 1 | 6 | 1 |
| MGGP | 6120.16 | 6 | 0.975 | 6 | 0.094 | 6 | 0.294 | 6 | 24 | 6 |
| Hybrid MGGP-GRG | 6028.23 | 5 | 0.981 | 1 | 0.088 | 4 | 0.279 | 5 | 15 | 4 |

Table 9 presents the ranking analysis of different methods for Data set 2. As shown, MGGP achieved the lowest summation of ranks and the best ranking number, while the worst performance belonged to the conventional method. Additionally, EA performs better than ANN but worse than MHBMO for the second dataset based on Table 9.

**Table 9** Ranking the performances of different models for developing stage-discharge rating curves of Data set 2

| Method | Data set 2 (test data) | | | | | | | | summation of ranks | Rank for Data set 1 |
| --- | --- | --- | --- | --- | --- | --- | --- | --- | --- | --- |
| SSE | Rank | NE | Rank | MARE | Rank | MXARE | Rank |
| Conventional | 3741.23 | 6 | 0.98 | 6 | 0.039 | 6 | 0.13 | 6 | 24 | 6 |
| EA | 183.24 | 3 | 0.99 | 4 | 0.0189 | 4 | 0.060 | 1 | 12 | 4 |
| MHBMO | 183.60 | 4 | 1.00 | 1 | 0.0189 | 4 | 0.060 | 1 | 10 | 3 |
| ANN | 184.38 | 5 | 0.99 | 4 | 0.0187 | 3 | 0.062 | 4 | 16 | 5 |
| MGGP | 113.6 | 2 | 1.00 | 1 | 0.0178 | 1 | 0.061 | 3 | 7 | 1 |
| Hybrid MGGP-GRG | 110.8 | 1 | 1.00 | 1 | 0.0180 | 2 | 0.062 | 4 | 8 | 2 |

Unlike for Data set 2, ANN performs better than EA for Data set 3, as shown in Table 10. Furthermore, Table 10 reveals that hybrid MGGP-GRG outperformed other methods for developing stage-discharge rating curves of the third dataset.

**Table 10** Ranking the performances of different models for developing stage-discharge rating curves of Data set 3

| Method | Data set 3 (test data) | | | | | | | | summation of ranks | Rank for Data set 1 |
| --- | --- | --- | --- | --- | --- | --- | --- | --- | --- | --- |
| SSE | Rank | NE | Rank | MARE | Rank | MXARE | Rank |
| Conventional | 31583.23 | 6 | 0.950 | 6 | 0.050 | 5 | 0.22 | 5 | 22 | 6 |
| EA | 7365.09 | 5 | 0.990 | 4 | 0.066 | 6 | 0.26 | 6 | 21 | 5 |
| MHBMO | 220.34 | 2 | 1.000 | 2 | 0.010 | 2 | 0.042 | 1 | 7 | 2 |
| ANN | 311.06 | 4 | 0.990 | 4 | 0.010 | 2 | 0.048 | 3 | 13 | 4 |
| MGGP | 229.25 | 3 | 0.997 | 3 | 0.010 | 2 | 0.045 | 2 | 10 | 3 |
| Hybrid MGGP-GRG | 214.63 | 1 | 1.000 | 1 | 0.009 | 1 | 0.048 | 3 | 6 | 1 |

The results of the ranking analysis for Data set 4 are presented in Table 11. As shown, the lowest summation of ranks and the best ranking number were achieved by the MHBMO algorithm, whereas the conventional method obtained the worst ranking number. Furthermore, EA performs better than ANN for the fourth dataset based on Table 11.

**Table 11** Ranking the performances of different models for developing stage-discharge rating curves of Data set 4

| Method | Data set 4 (test data) | | | | | | | | summation of ranks | Rank for Data set 1 |
| --- | --- | --- | --- | --- | --- | --- | --- | --- | --- | --- |
| SSE | Rank | NE | Rank | MARE | Rank | MXARE | Rank |
| Conventional | 47 | 6 | 0.990 | 5 | 0.025 | 4 | 0.08 | 5 | 20 | 6 |
| EA | 16.39 | 1 | 0.990 | 5 | 0.018 | 1 | 0.046 | 1 | 8 | 2 |
| MHBMO | 16.40 | 2 | 1.000 | 1 | 0.018 | 1 | 0.046 | 1 | 5 | 1 |
| ANN | 16.55 | 3 | 1.000 | 1 | 0.038 | 5 | 0.083 | 6 | 15 | 4 |
| MGGP | 18.16 | 5 | 0.998 | 4 | 0.043 | 6 | 0.076 | 4 | 19 | 5 |
| Hybrid MGGP-GRG | 16.71 | 4 | 1.000 | 1 | 0.025 | 3 | 0.054 | 3 | 11 | 3 |

The detailed calculations of the ranking analysis for the hysteresis-affected data are shown in Tables 12-15. According to Table 12, the MGGP performed much better than ANN, EA, MHBMO, RF and the conventional method for Data set 5, while the hybrid MGGP-GRG improves the performance of MGGP even more.

**Table 12** Ranking the performances of different models for developing stage-discharge rating curves of Data set 5

| Method | Data set 5 (test data) | | | | | | | | summation of ranks | Rank for Data set 1 |
| --- | --- | --- | --- | --- | --- | --- | --- | --- | --- | --- |
| SSE | Rank | NE | Rank | MARE | Rank | MXARE | Rank |
| Conventional | 21822676000 | 6 | 0.974 | 5 | 0.05 | 6 | 0.15 | 6 | 23 | 5 |
| EA | 21780067017 | 5 | 0.973 | 6 | 0.05 | 6 | 0.15 | 6 | 23 | 5 |
| RF | 12548719606 | 3 | 0.985 | 4 | 0.04 | 3 | 0.08 | 2 | 12 | 3 |
| MHBMO | 13839023896.00 | 4 | 0.995 | 3 | 0.04 | 4 | 0.11 | 4 | 15 | 4 |
| ANN | 22189984412 | 7 | 0.973 | 7 | 0.05 | 5 | 0.13 | 5 | 24 | 7 |
| MGGP | 11708806606 | 2 | 0.996 | 1 | 0.03 | 1 | 0.09 | 3 | 7 | 2 |
| Hybrid MGGP-GRG | 11337677713 | 1 | 0.996 | 1 | 0.03 | 1 | 0.01 | 1 | 4 | 1 |

Table 13 shows that MHBMO and EA achieved the best ranking numbers for developing stream rating curves under unsteady condition for Data set 6. Unlike the results of previous datasets, none of the AI models perform better than the conventional method for Data set 6.

**Table 13** Ranking the performances of different models for developing stage-discharge rating curves of Data set 6

| Method | Data set 6 (test data) | | | | | | | | summation of ranks | Rank for Data set 1 |
| --- | --- | --- | --- | --- | --- | --- | --- | --- | --- | --- |
| SSE | Rank | NE | Rank | MARE | Rank | MXARE | Rank |
| Conventional | 1814 | 1 | 0.950 | 3 | 0.04 | 3 | 0.27 | 4 | 11 | 3 |
| EA | 1916 | 2 | 0.974 | 1 | 0.04 | 1 | 0.28 | 5 | 9 | 1 |
| RF | 3574 | 7 | 0.902 | 7 | 0.14 | 7 | 0.33 | 7 | 28 | 7 |
| MHBMO | 1916 | 2 | 0.974 | 1 | 0.04 | 1 | 0.28 | 5 | 9 | 1 |
| ANN | 2651 | 6 | 0.927 | 6 | 0.09 | 4 | 0.21 | 3 | 19 | 6 |
| MGGP | 2500 | 5 | 0.931 | 4 | 0.11 | 5 | 0.18 | 1 | 15 | 4 |
| Hybrid MGGP-GRG | 2496 | 4 | 0.931 | 4 | 0.11 | 6 | 0.19 | 2 | 16 | 5 |

The ranking results presented in Table indicates that the hybrid MGGP-GRG and MGGP achieved the first and second best ranking numbers for developing stage-discharge relationship of Data set 7. Unlike the results shown in Table 13, the AI models perform better than other methods for Data set 7, as shown in Table 14.

**Table 14** Ranking the performances of different models for developing stage-discharge rating curves of Data set 7

| Method | Data set 7 (test data) | | | | | | | | summation of ranks | Rank for Data set 1 |
| --- | --- | --- | --- | --- | --- | --- | --- | --- | --- | --- |
| SSE | Rank | NE | Rank | MARE | Rank | MXARE | Rank |
| Conventional | 24906002 | 6 | 0.610 | 6 | 0.22 | 5 | 0.95 | 7 | 24 | 6 |
| EA | 24133003 | 5 | 0.867 | 4 | 0.23 | 6 | 0.71 | 4 | 19 | 4 |
| RF | 15944107 | 4 | 0.749 | 5 | 0.17 | 4 | 0.87 | 6 | 19 | 4 |
| MHBMO | 24907408 | 7 | 0.608 | 7 | 0.24 | 7 | 0.77 | 5 | 26 | 7 |
| ANN | 6499608 | 2 | 0.898 | 2 | 0.09 | 3 | 0.24 | 3 | 10 | 3 |
| MGGP | 6572739 | 3 | 0.897 | 3 | 0.08 | 1 | 0.24 | 2 | 9 | 2 |
| Hybrid MGGP-GRG | 6492404.224 | 1 | 0.898 | 1 | 0.08 | 2 | 0.23 | 1 | 5 | 1 |

Table 15 shows the results of the ranking analysis for Data set 8. According to Table 15, the MGGP-GRG was found as the best model for estimating discharges of Data set 8. Also, EA and MHBMO performed quite the same for Data set 8. Finally, Tables 8-12 and Tables 14-15 indicate that combining MGGP with GRG enhances the performances of MGGP for seven out of eight datasets.

**Table 15** Ranking the performances of different models for developing stage-discharge rating curves of Data set 8

| Method | Data set 8 (test data) | | | | | | | | summation of ranks | Rank for Data set 1 |
| --- | --- | --- | --- | --- | --- | --- | --- | --- | --- | --- |
| SSE | Rank | NE | Rank | MARE | Rank | MXARE | Rank |
| Conventional | 3018398 | 5 | 0.950 | 6 | 0.06 | 4 | 0.16 | 3 | 18 | 5 |
| EA | 2992628 | 4 | 0.961 | 3 | 0.06 | 5 | 0.16 | 1 | 13 | 3 |
| RF | 8379269 | 7 | 0.892 | 7 | 0.12 | 7 | 0.30 | 7 | 28 | 7 |
| MHBMO | 2988805 | 3 | 0.961 | 3 | 0.07 | 6 | 0.16 | 1 | 13 | 3 |
| ANN | 3376647 | 6 | 0.956 | 5 | 0.06 | 3 | 0.20 | 6 | 20 | 6 |
| MGGP | 2889826 | 2 | 0.963 | 1 | 0.06 | 2 | 0.17 | 4 | 9 | 2 |
| Hybrid MGGP-GRG | 2881054 | 1 | 0.963 | 1 | 0.06 | 1 | 0.18 | 5 | 8 | 1 |
